# Supplementary material for: Cumulative impact of health deficits, social vulnerabilities, and protective factors on cognitive dynamics in late life: a multistate modeling approach
Source: Alzheimers Res Ther. 2015 Jun 5;7(1):38. doi: 10.1186/s13195-015-0120-7 (PMC4457088; doi:10.1186/s13195-015-0120-7)
Supplement: Additional file 1: — Contains appendices A-C which list the items from the Honolulu-Asia Aging Study that were used to create index variables. [file 13195_2015_120_MOESM1_ESM.pdf]

**Appendix A.** Frailty index items coded 0 for absent, 1 for present.

| Functional Deficits                                                                                                                                                                                                                                                                                                                                                                                                                                                                                                                                            | Deficits of Diseases and Conditions                                                                                                                                                                                                                                                                                                                                                                                                                                             |                                                                                                                                                                                                                                                                                                                                                                                                                                                                                                                                                             |
|----------------------------------------------------------------------------------------------------------------------------------------------------------------------------------------------------------------------------------------------------------------------------------------------------------------------------------------------------------------------------------------------------------------------------------------------------------------------------------------------------------------------------------------------------------------|---------------------------------------------------------------------------------------------------------------------------------------------------------------------------------------------------------------------------------------------------------------------------------------------------------------------------------------------------------------------------------------------------------------------------------------------------------------------------------|-------------------------------------------------------------------------------------------------------------------------------------------------------------------------------------------------------------------------------------------------------------------------------------------------------------------------------------------------------------------------------------------------------------------------------------------------------------------------------------------------------------------------------------------------------------|
| <ul style="list-style-type: none"> <li>• Difficulty walking 1/2 mile</li> <li>• Difficulty walking up 10 steps</li> <li>• Unable to do heavy work</li> <li>• Difficulty lifting</li> <li>• Difficulty reaching out</li> <li>• Difficulty gripping with hands</li> <li>• Hearing impairment</li> <li>• Vision impairment</li> <li>• Dizziness</li> <li>• Unusually irritable</li> <li>• Trouble with focus</li> <li>• Feelings of exhaustion</li> <li>• Lack of hope for future</li> <li>• Feelings of loneliness</li> <li>• Trouble with initiation</li> </ul> | <ul style="list-style-type: none"> <li>• Previous heart attack</li> <li>• Angina</li> <li>• High blood pressure</li> <li>• Diabetes</li> <li>• Heart disease</li> <li>• Cholecystitis or gall stones</li> <li>• Polyps of large bowel</li> <li>• Stomach or peptic ulcer</li> <li>• Prostate problems</li> <li>• Kidney disease</li> <li>• Cancer (except skin)</li> <li>• Arthritis</li> <li>• Cataract</li> <li>• Signs of parkinsonism</li> <li>• Angina pectoris</li> </ul> | <ul style="list-style-type: none"> <li>• Awakened at night by coughing</li> <li>• Swelling of your feet or ankles</li> <li>• Lack of appetite</li> <li>• Feelings of fear</li> <li>• Restless sleep</li> <li>• Myocardial infarction</li> <li>• Peripheral vascular disease</li> <li>• Pulmonary disease</li> <li>• Fatigue past 2 weeks</li> <li>• Regular cough</li> <li>• Bronchitis (acute or chronic)</li> <li>• Bone Fracture</li> <li>• Shingles</li> <li>• Polypharmacy (&gt;5 medications)</li> <li>• Dissatisfied with quality of life</li> </ul> |

**Appendix B.** Social Vulnerability index items coded 0 for absent, 1 for present.

| <b>Social Deficits</b>                                                                                                                                                                                                                                                                                                                                                               |                                                                                                                                                                                                                                                                                                                                                                           |                                                                                                                                                                                                                                                                                                              |
|--------------------------------------------------------------------------------------------------------------------------------------------------------------------------------------------------------------------------------------------------------------------------------------------------------------------------------------------------------------------------------------|---------------------------------------------------------------------------------------------------------------------------------------------------------------------------------------------------------------------------------------------------------------------------------------------------------------------------------------------------------------------------|--------------------------------------------------------------------------------------------------------------------------------------------------------------------------------------------------------------------------------------------------------------------------------------------------------------|
| <ul style="list-style-type: none"> <li>• When lonely, there is no one to talk to</li> <li>• I rarely meet/talk with family or friends</li> <li>• Cannot find somebody help w/ daily chore</li> <li>• Do not know somebody that can turn to with personal problem</li> <li>• Do not trust at least one person's advice</li> <li>• Could not find someone to care for house</li> </ul> | <ul style="list-style-type: none"> <li>• Do not have somebody to talk to about important decisions</li> <li>• People do not talk to you about important decisions</li> <li>• Don't have people to help with things like shopping, etc.</li> <li>• Living alone</li> <li>• See few many relatives once a month</li> <li>• Feel close to few people or relatives</li> </ul> | <ul style="list-style-type: none"> <li>• No close friends</li> <li>• Do not participate in any groups</li> <li>• Hearing cause difficulty when visiting friends</li> <li>• Do not do regular volunteer work</li> <li>• Marital status - Single</li> <li>• Low yearly household income (&lt;15000)</li> </ul> |

**Appendix C.** Protection index items coded 0 for absent, 1 for present.

| <b>Protective Factors</b>                                                                                                                                                                                                                                                                                                        |                                                                                                                                                                                                                                                                                                     |                                                                                                                                                                                                                                                                                          |
|----------------------------------------------------------------------------------------------------------------------------------------------------------------------------------------------------------------------------------------------------------------------------------------------------------------------------------|-----------------------------------------------------------------------------------------------------------------------------------------------------------------------------------------------------------------------------------------------------------------------------------------------------|------------------------------------------------------------------------------------------------------------------------------------------------------------------------------------------------------------------------------------------------------------------------------------------|
| <ul style="list-style-type: none"> <li>• Healthy Body mass index</li> <li>• (BMI = 18.5-25)</li> <li>• Calcium-channel blockers Use</li> <li>• Take vitamins/supplements</li> <li>• Recently visited a dentist</li> <li>• Ace-inhibitors Use</li> <li>• Beta-blockers Use</li> <li>• High yearly income (&gt;\$30000)</li> </ul> | <ul style="list-style-type: none"> <li>• Availability of doctor</li> <li>• Availability of hospital care</li> <li>• Regular exercise</li> <li>• Non-smoker</li> <li>• Physical Active</li> <li>• Satisfied with quality of life</li> <li>• Climbed more than 6 flights of stairs per day</li> </ul> | <ul style="list-style-type: none"> <li>• Moderate Alcohol Intake per month (oz)</li> <li>• Good self-rated general health</li> <li>• Able to tolerate job stress</li> <li>• Regular aspirin consumption</li> <li>• Speak Japanese often</li> <li>• Read or write Japanese now</li> </ul> |
